# Supplementary material
Source: PubMed Central journal article supplement (PMC3749497)
Supplement: ismej201358x1.pdf [file ismej201358x1.pdf]

## SUPPLEMENTARY MATERIALS AND METHODS

### Identification of the PhoBR two component system in cyanobacterial hosts

To examine whether cyanophage genes containing *pho* box motifs were found in phage isolated from hosts with the PhoBR phosphate sensing and response system we systematically identified *phoR* and *phoB* genes in host genomes. Many sequenced *Prochlorococcus* and most *Synechococcus* genomes contain *phoR* and *phoB* genes (Kettler *et al.*, 2007). The recently sequenced and unpublished *Synechococcus* WH8109 does not have annotated *phoR* and *phoB* genes and so was probed for evidence of the PhoBR two-component system as follows. We used blastp to identify the reciprocal best BLAST hits between a custom database of 9,604 cyanobacterial orthologous groups from the ProPortal database and all genes in the *Synechococcus* WH8109 genome (Multi-FASTA file of peptides downloaded from Moore Foundation Microbial Genome Sequencing Project, <http://moore.jcvi.org/>, Genbank project accession: ACNY00000000) to identify *Synechococcus* WH8109 genes with reciprocal best hits to *Prochlorococcus* or *Synechococcus phoR* or *phoB* sequences.

## SUPPLEMENTARY FIGURES

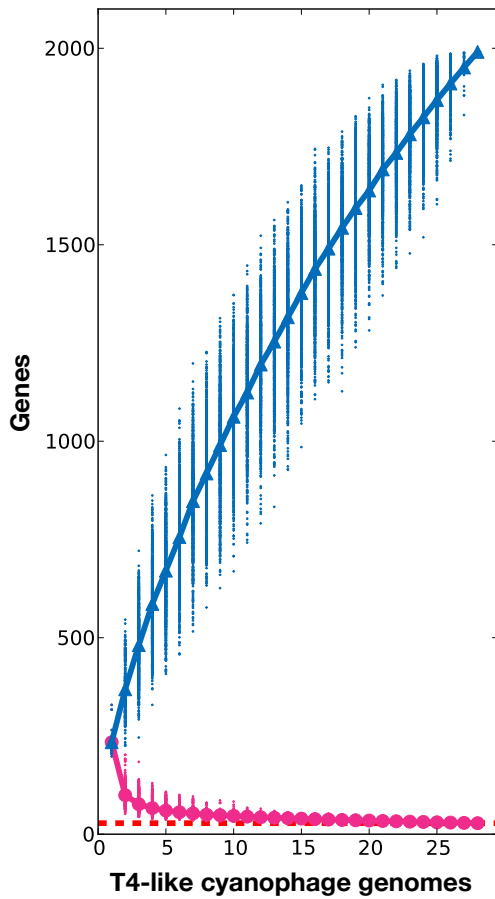

**Supplementary Figure 1:** Core and pan genomes for 28 cyanomyovirus genomes. Core genes, shared by all 28 genomes, are shown in pink; pan genome genes, found in one or more cyanomyovirus genomes, are shown in blue. Triangles and circles represent the average of the combination of values for each subset of genomes; each individual value is indicated by a small dot. The red dotted line hits the X-axis at 28, the total number of genes (26 single copy, and two multi-copy) shared by all 28 genomes.

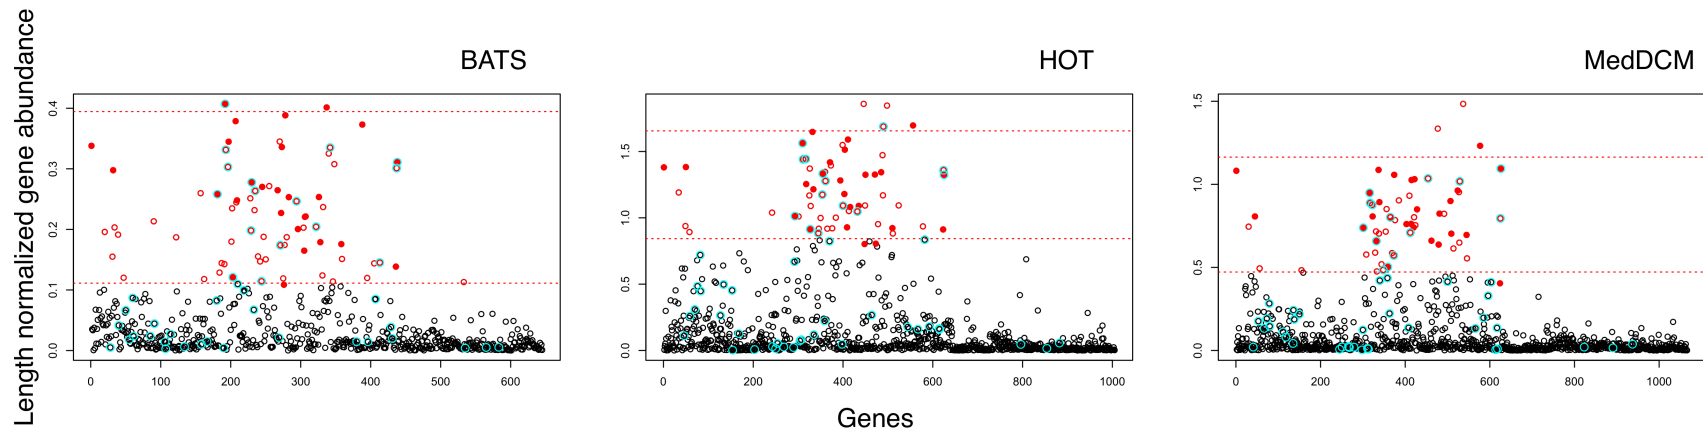

**Supplementary Figure 2:** Length-normalized cyanomyovirus gene abundance in three environments. In all plots, red dashed lines indicate the first and third quartile cutoffs for core-like genes defined by the abundance of culture-defined core genes. Red filled circles are signature core genes; open red circles are metagenome-defined core genes, a few are present at levels higher than the culture defined core boundaries. A cyan outline indicates genes annotated with Pfam domains that are shared between phage and host genomes.

## SUPPLEMENTARY TABLES

**Supplementary Table 1:** Cyanomyovirus genes found at signature core gene frequencies in one or two environmental metagenomic datasets.

| Gene cluster | Specific to | Gene name            | In host? | Cyanomyovirus genes in cluster | Pfam annotation | Pfam domain description                        | ProPortal gene cluster description |
|--------------|-------------|----------------------|----------|--------------------------------|-----------------|------------------------------------------------|------------------------------------|
| PhCOG204     | BATS        |                      |          | 7                              |                 |                                                | Hypothetical protein               |
| PhCOG703     | BATS        |                      | Y        | 2                              |                 |                                                | Hypothetical protein               |
| PhCOG1424    | BATS        |                      |          | 3                              |                 |                                                | Hypothetical protein               |
| PhCOG71200   | BATS        |                      |          | 6                              |                 |                                                | Hypothetical protein               |
| PhCOG71673   | BATS        | Hli04                | Y        | 3                              |                 |                                                | High Light Inducible Proteins      |
| PhCOG72544   | BATS        | 2OG-Fe(II) oxygenase | Y        | 25                             | PF03171         | 2OG-Fe(II) oxygenase superfamily               | 2OG-Fe(II) oxygenase               |
| PhCOG73152   | BATS        | pstS                 | Y        | 16                             | PF01547         | Bacterial extracellular solute-binding protein | Phosphate transporter subunit      |
| PhCOG71491   | HOT         | Dam                  | N        | 13                             | PF01555         | DNA methylase                                  | DNA adenine Methylase              |
| PCOG72385    | HOT         |                      |          | 11                             |                 |                                                | Hypothetical protein               |
| PCOG71457    | HOT         | HN                   | Y        | 9                              |                 |                                                | Hemagglutinin domain               |
| PCOG71521    | HOT         |                      |          | 18                             |                 |                                                | Hypothetical protein               |
| PhCOG72994   | HOT         |                      |          | 15                             |                 |                                                | Hypothetical protein               |
| PhCOG258     | MedDCM      |                      |          | 16                             |                 |                                                | Hypothetical protein               |
| PhCOG1139    | MedDCM      |                      |          | 9                              |                 |                                                | Hypothetical protein               |

| Gene cluster | Specific to | Gene name | In host? | Cyanomyovirus genes in cluster | Pfam annotation                    | Pfam domain description                                                                            | ProPortal gene cluster description |
|--------------|-------------|-----------|----------|--------------------------------|------------------------------------|----------------------------------------------------------------------------------------------------|------------------------------------|
| PhCOG71460   | MedDCM      |           |          |                                | 23                                 |                                                                                                    | Hypothetical protein               |
| PhCOG72482   | MedDCM      |           |          |                                | 19                                 |                                                                                                    | Hypothetical protein               |
| PhCOG224     | BATS/HOT    |           |          |                                | 11                                 |                                                                                                    | Hypothetical protein               |
| PhCOG3728    | BATS        |           |          |                                | 1                                  |                                                                                                    | Hypothetical protein               |
| PhCOG71554   | BATS        | PsbD      | Y        |                                | 20 PF00124                         | Photosynthetic reaction centre protein                                                             | photosystem II D2 protein          |
| PhCOG71750   | BATS        | gp7       |          |                                | 15                                 |                                                                                                    | gp7                                |
| PhCOG72417   | BATS/HOT    | gp59      |          |                                | 22 PF08994/PF08993                 | T4 gene 59 helicase, C terminal/T4 gene 59 helicase, N terminal                                    | loader of gp41 DNA helicase        |
| PhCOG73121   | BATS        |           | Y        |                                | 27                                 |                                                                                                    | Hypothetical protein               |
| PhCOG198     | BATS/HOT    |           |          |                                | 16                                 |                                                                                                    | Hypothetical protein               |
| PhCOG71490   | MedDCM      |           | Y        |                                | 24 PF04851/PF00270/PF00176/PF02562 | Type III restriction enzyme, res subunit/DEAD/DEAH box helicase/SNF2 family N-terminal domain/PhoH | Helicase                           |
| PhCOG71360   | HOT/MedDCM  |           |          |                                | 26                                 |                                                                                                    | Hypothetical protein               |
| PhCOG71523   | HOT/MedDCM  | CP12      | Y        |                                | 24 PF02672                         | CP12                                                                                               | CP12                               |
| PhCOG72738   | HOT/MedDCM  |           |          |                                | 16                                 |                                                                                                    | Hypothetical protein               |
| PhCOG72130   | BATS/MedDCM |           |          |                                | 16                                 |                                                                                                    | Hypothetical protein               |
| PCOG71682    | BATS/MedDCM | talC      |          |                                | 27 PF00923                         | Transaldolase                                                                                      | Transaldolase-like protein         |

| Gene cluster | Specific to | Gene name | In host? | Cyanomyovirus genes in cluster | Pfam annotation | Pfam domain description | ProPortal gene cluster description |
|--------------|-------------|-----------|----------|--------------------------------|-----------------|-------------------------|------------------------------------|
| PhCOG71394   | BATS/MedDCM | gp62      |          | 26                             |                 |                         | clamp loader subunit               |
| PhCOG173     | BATS/MedDCM |           |          | 40                             |                 |                         | Hypothetical protein               |

**Supplementary Table 2:** Predicted pho boxes within 100bp upstream of genes in 28 cyanomyovirus genomes.

| Genome   | Accession | Gene Id    | Cluster Id  | Strand | Genomic location | Predicted pho box               |
|----------|-----------|------------|-------------|--------|------------------|---------------------------------|
| MED4-213 | HQ634174  | CPMG_00122 | Orphan_1251 | -      | 118107:118137    | CTAAATAGGTTTTTACCATTCTATGAACT   |
| MED4-213 | HQ634174  | CPMG_00031 | PhCOG71052  | -      | 45027:45057      | GTAAAGCTAAATATTATATGGAATTCTTAG  |
| MED4-213 | HQ634174  | CPMG_00195 | PhCOG71393  | -      | 164324:164354    | ATTTTTCTTGATTCTATAAAAATTTACCTA  |
| MED4-213 | HQ634174  | CPMG_00061 | PhCOG71488  | +      | 77341:77371      | TATAAAAACCAATTAATAGTGTCACACA    |
| MED4-213 | HQ634174  | CPMG_00003 | PhCOG72320  | -      | 3222:3252        | TATTATTAATCTTAACGCAATCTAATTTT   |
| MED4-213 | HQ634174  | CPMG_00003 | PhCOG72320  | -      | 3233:3263        | TTATAAATAATATTATTAATCTTAACGC    |
| MED4-213 | HQ634174  | CPMG_00144 | PhCOG72398  | -      | 128681:128711    | AGTAATTTTTACTTTGTATAATGTTATACA  |
| MED4-213 | HQ634174  | CPMG_00052 | PhCOG72481  | -      | 74197:74227      | CTTACGTAATTGTTACGTATTGTTTCAACT  |
| P-HM1    | NC_015280 | PHM1_050   | PhCOG2046   | +      | 34398:34428      | ATTTGGTAGATTTTGGAAATATCTTAAAAA  |
| P-HM1    | NC_015280 | PHM1_091   | PhCOG71052  | +      | 67888:67918      | GTAAAGCTAAATATTATATGGAATTCTTAG  |
| P-HM1    | NC_015280 | PHM1_119   | PhCOG72320  | +      | 110167:110197    | TATTATTAATCTTAACGCAATCTAATTTT   |
| P-HM1    | NC_015280 | PHM1_199   | PhCOG72398  | +      | 165778:165808    | CATAAAGAAAACCTTAAGACTGTCACAAAAC |
| P-HM2    | NC_015284 | PHM2_075   | Orphan_264  | +      | 41500:41530      | ATGCACTGCTCTTTAAGTCGAACTTAAGCA  |

| Genome | Accession | Gene Id    | Cluster Id  | Strand | Genomic location | Predicted pho box               |
|--------|-----------|------------|-------------|--------|------------------|---------------------------------|
| P-HM2  | NC_015284 | PHM2_075   | Orphan_264  | +      | 41511:41541      | TTTAAGTCGAACTTAAGCAGCGATCCAGTC  |
| P-HM2  | NC_015284 | PHM2_211   | Orphan_282  | +      | 171548:171578    | ATTGACTTCTACGTAAAGTTTTGTTAATAT  |
| P-HM2  | NC_015284 | PHM2_052   | PhCOG2046   | +      | 35576:35606      | TTTCATAGTGATTTTCATAGTCATTTAGAAA |
| P-HM2  | NC_015284 | PHM2_052   | PhCOG2046   | +      | 35587:35617      | TTTCATAGTCATTTAGAAATGTATAAAAAA  |
| P-HM2  | NC_015284 | PHM2_090   | PhCOG71052  | +      | 68113:68143      | GTTAAGCTAAATATTATATGGAATTCTTAG  |
| P-HM2  | NC_015284 | PHM2_072   | PhCOG71068  | +      | 40759:40789      | TATAATAGTAGTATAAAACAAACATTTACAT |
| P-HM2  | NC_015284 | PHM2_072   | PhCOG71068  | +      | 40770:40800      | TATAAACAAACATTTACATCACATTAGATT  |
| P-HM2  | NC_015284 | PHM2_238   | PhCOG71329  | +      | 181095:181125    | ATTTAGACGACCTTGCTGATGAGTTATTTCG |
| P-HM2  | NC_015284 | PHM2_121   | PhCOG72320  | +      | 114365:114395    | TATTATTAATCTTAACGCAATCTAATTTT   |
| P-RSM1 | HQ634175  | CPPG_00012 | Orphan_1256 | -      | 11172:11202      | ATTAATAATAATGTAGTTATGTGTTAATC   |
| P-RSM1 | HQ634175  | CPPG_00017 | PhCOG67     | -      | 12637:12667      | ATTGATTTTAATCTCATTACTCTTTATAAT  |
| P-RSM1 | HQ634175  | CPPG_00026 | PhCOG72994  | -      | 14733:14763      | ATTCAGAGTTATTTTACTCTATTATAATAA  |
| P-RSM1 | HQ634175  | CPPG_00172 | PhCOG73251  | -      | 114014:114044    | CTTACAGTGTTATTGTACATGTATTTGACA  |
| P-RSM3 | HQ634176  | CPQG_00143 | PhCOG186    | -      | 114709:114739    | TTCAATAGTCTTATAATTAGTATCGTAA    |
| P-RSM3 | HQ634176  | CPQG_00041 | PhCOG71490  | -      | 42770:42800      | TTTTATGCTATAATGATTATAAGTTAAATT  |
| P-RSM3 | HQ634176  | CPQG_00119 | PhCOG71682  | -      | 98468:98498      | TTTTTTTATGCTTTTATATACACATAGGTT  |
| P-RSM3 | HQ634176  | CPQG_00026 | PhCOG71906  | -      | 38160:38190      | TTCAAATAATATTATACTATTATAATAGT   |
| P-RSM3 | HQ634176  | CPQG_00026 | PhCOG71906  | -      | 38171:38201      | TTTTACTACCATTTCAAATAATATTATACT  |
| P-RSM3 | HQ634176  | CPQG_00122 | PhCOG72385  | -      | 99448:99478      | CTCCCTCTTTCTTAAGATTACATTAAGTG   |
| P-RSM3 | HQ634176  | CPQG_00112 | PhCOG72398  | -      | 95861:95891      | TATAATATGTACATAACTTTACATTAGTTA  |

| Genome | Accession | Gene Id    | Cluster Id  | Strand | Genomic location | Predicted pho box              |
|--------|-----------|------------|-------------|--------|------------------|--------------------------------|
| P-RSM3 | HQ634176  | CPQG_00123 | PhCOG73152  | -      | 100668:100698    | GTAAATGTAGTTAAAGATACAGTTAAAAT  |
| P-RSM3 | HQ634176  | CPQG_00036 | PhCOG929    | -      | 40576:40606      | CTCCATTTTAATTATTCATCCATTACAAT  |
| P-RSM4 | NC_015283 | PRSM4_061  | PhCOG1025   | +      | 41560:41590      | AGGAATACGTTTTTAAGTCGAACTTAAGTA |
| P-RSM4 | NC_015283 | PRSM4_079  | PhCOG71068  | +      | 49170:49200      | TTTATAATAATAGTAATTAACATTTTTAT  |
| P-RSM4 | NC_015283 | PRSM4_141  | PhCOG72130  | +      | 121060:121090    | ACTAAACTTTCCTTGTTATTCACTCAAAA  |
| P-RSM4 | NC_015283 | PRSM4_217  | PhCOG72398  | +      | 166652:166682    | ATTATATATAATTGTAACAGTTCTTAATAA |
| P-RSM4 | NC_015283 | PRSM4_007  | PhCOG72420  | +      | 2191:2221        | TTCTAGTATAATTAACACATACACAAGGA  |
| P-RSM4 | NC_015283 | PRSM4_224  | PhCOG72803  | +      | 167815:167845    | CTTTTTTATAAATAATCTTATGATAACGT  |
| P-RSM4 | NC_015283 | PRSM4_097  | PhCOG72899  | +      | 53702:53732      | CTTGATATATTATTCATAATTCATTACA   |
| P-RSM4 | NC_015283 | PRSM4_097  | PhCOG72899  | +      | 53726:53756      | TTTACATCAGTATTAATAAATTTGGAGA   |
| P-RSM4 | NC_015283 | PRSM4_178  | PhCOG73152  | +      | 142812:142842    | CTTTCGCAGTTCTAACCTGTAGTTAAAGA  |
| P-RSM4 | NC_015283 | PRSM4_178  | PhCOG73152  | +      | 142823:142853    | CTAACCTGTAGTTAAAGATACAAAACACT  |
| P-RSM6 | HQ634193  | CPXG_00145 | Orphan_1330 | -      | 140661:140691    | TCTCAAATCGTTTAACTACTATTATAGA   |
| P-RSM6 | HQ634193  | CPXG_00145 | Orphan_1330 | -      | 140672:140702    | ATTTACTTTAATCTCAAATCGTTTAACT   |
| P-RSM6 | HQ634193  | CPXG_00145 | Orphan_1330 | -      | 140677:140707    | TTTGTATTTACTTTAATCTCAAATCGTTT  |
| P-RSM6 | HQ634193  | CPXG_00142 | PhCOG71252  | -      | 139824:139854    | GTAAATTAGGTCATTATTATTATTAAGGT  |
| P-RSM6 | HQ634193  | CPXG_00139 | PhCOG71796  | -      | 138784:138814    | ATTATGTTATATTAATAATTTTTTCGTAT  |
| P-RSM6 | HQ634193  | CPXG_00139 | PhCOG71796  | -      | 138785:138815    | TATTATGTTATATTAATAATTTTTTCGTA  |
| P-RSM6 | HQ634193  | CPXG_00139 | PhCOG71796  | -      | 138860:138890    | TTTGTCCAATTCTTATCATTAATTAATAA  |
| P-RSM6 | HQ634193  | CPXG_00096 | PhCOG72321  | -      | 63720:63750      | TTTATATTATAAGTAAACTATTTTTCCAA  |



| Genome | Accession | Gene Id     | Cluster Id | Strand | Genomic location | Predicted pho box               |
|--------|-----------|-------------|------------|--------|------------------|---------------------------------|
| P-RSM6 | HQ634193  | CPXG_00017  | PhCOG72398 | -      | 10236:10266      | TTTGCTATATAATTATGTAACAGTTCTTTA  |
| P-RSM6 | HQ634193  | CPXG_00017  | PhCOG72398 | -      | 10254:10284      | CTTGACAGAAATTTAATCTTTGCTATATAA  |
| P-SSM2 | NC_006883 | PSSM2_283   | Orphan_1   | +      | 208038:208068    | CTTTCTTATTAAATAATAGTATGTTATTC   |
| P-SSM2 | NC_006883 | PSSM2_243   | PhCOG2077  | +      | 187040:187070    | CTTTCATATTTCTGAGTATTTCTTACTGT   |
| P-SSM2 | NC_006883 | PSSM2_102   | PhCOG611   | +      | 69140:69170      | ATTCCATCAAACCTTCAAATTTTTTTTCGCT |
| P-SSM2 | NC_006883 | PSSM2_247   | PhCOG173   | +      | 189283:189313    | TATAAACGGATACTAAACTCCCTTAACCT   |
| P-SSM2 | NC_006883 | PSSM2_247   | PhCOG173   | +      | 189294:189324    | ACTAAACTTCCCTTAACCTTCTCTTAGTTT  |
| P-SSM2 | NC_006883 | PSSM2_247   | PhCOG173   | +      | 189305:189335    | CTTAACCTTCTCTTAGTTTACATATCAATT  |
| P-SSM2 | NC_006883 | PSSM2_247   | PhCOG173   | +      | 189316:189346    | CTTAGTTTACATATCAATTAATTTGATAT   |
| P-SSM2 | NC_006883 | PSSM2_247   | PhCOG173   | +      | 189321:189351    | TTTACATATCAATTAATTTGATATAATGT   |
| P-SSM2 | NC_006883 | PSSM2_247   | PhCOG173   | +      | 189346:189376    | AATGTATAGATATTACAGTTTCTTTAAAAA  |
| P-SSM2 | NC_006883 | PSSM2_315.5 | PhCOG72256 | +      | 242844:242874    | TATAATAACTACTAAATAATTTTTTAAAC   |
| P-SSM2 | NC_006883 | PSSM2_134   | PhCOG72320 | +      | 118001:118031    | TTTAACAAATCTATAAATAAGTATAGATTC  |
| P-SSM2 | NC_006883 | PSSM2_242   | PhCOG72352 | -      | 187105:187135    | TTTATTATATATTATAACATACTTTTAGTA  |
| P-SSM2 | NC_006883 | PSSM2_242   | PhCOG72352 | -      | 187106:187136    | TTTTATTATATATTATAACATACTTTTAGT  |
| P-SSM2 | NC_006883 | PSSM2_254   | PhCOG72394 | +      | 192699:192729    | ATAAGAGTATTTTTTATTATTGTTTTATCA  |
| P-SSM2 | NC_006883 | PSSM2_272   | PhCOG72398 | +      | 205579:205609    | GTTAAGGTTTACTATATAATTATGTAAAGA  |
| P-SSM2 | NC_006883 | PSSM2_054   | PhCOG72455 | +      | 48631:48661      | TTTTATAATGTTTATATTATAACTTCGACT  |
| P-SSM2 | NC_006883 | PSSM2_100   | PhCOG72979 | +      | 66957:66987      | TTTTGCTATACTTAATTTGTACACACGAA   |
| P-SSM2 | NC_006883 | PSSM2_038   | PhCOG73040 | +      | 40786:40816      | TGTAGGACAGGCTTTATAATTTTTTAAGAA  |

| Genome | Accession | Gene Id    | Cluster Id  | Strand | Genomic location | Predicted pho box               |
|--------|-----------|------------|-------------|--------|------------------|---------------------------------|
| P-SSM2 | NC_006883 | PSSM2_315  | PhCOG73090  | +      | 241207:241237    | ATATAATCTTTTTTAATTTATTATTTAATT  |
| P-SSM2 | NC_006883 | PSSM2_315  | PhCOG73090  | +      | 241208:241238    | TATAATCTTTTTTAATTTATTATTTAATTC  |
| P-SSM2 | NC_006883 | PSSM2_315  | PhCOG73090  | +      | 241215:241245    | TTTTTAATTTATTATTTAATTCTTGATAA   |
| P-SSM2 | NC_006883 | PSSM2_315  | PhCOG73090  | +      | 241218:241248    | TTTAATTTATTATTTAATTCCTTGATAATCA |
| P-SSM2 | NC_006883 | PSSM2_315  | PhCOG73090  | +      | 241267:241297    | TTCCGTTTCTGTAAATATAATCATTATAA   |
| P-SSM2 | NC_006883 | PSSM2_315  | PhCOG73090  | +      | 241278:241308    | GTAAATATAATCATTATAAAATATTTAAAT  |
| P-SSM2 | NC_006883 | PSSM2_315  | PhCOG73090  | +      | 241289:241319    | CATTATAAATATTTAAATTTATTGTGTGTT  |
| P-SSM2 | NC_006883 | PSSM2_307  | PhCOG73098  | +      | 235236:235266    | TATAAATCACCAATGATATAATATTAAACA  |
| P-SSM2 | NC_006883 | PSSM2_200  | PhCOG73202  | +      | 162174:162204    | ATTACTATATAGTTCAGTTGCGTTTAGCAA  |
| P-SSM2 | NC_006883 | PSSM2_144  | PhCOG73251  | +      | 124862:124892    | TATAAACAATTATTAATAAGGATATATTAA  |
| P-SSM3 | HQ337021  | CYXG_00186 | Orphan_1068 | +      | 156076:156106    | TTTATAAATAAAATCAGCAAGAGTTAACGT  |
| P-SSM3 | HQ337021  | CYXG_00186 | Orphan_1068 | +      | 156087:156117    | AATCAGCAAGAGTTAACGTGAATTTAGTAT  |
| P-SSM3 | HQ337021  | PRAG_00035 | Orphan_1216 | +      | 28815:28845      | TTTAAAGGTATTATAATATGGGTATAGACG  |
| P-SSM3 | HQ337021  | PRAG_00066 | PhCOG186    | +      | 49853:49883      | TTTCTATAGTTCTTATAATTAGTATTATAG  |
| P-SSM3 | HQ337021  | CYXG_00010 | PhCOG309    | +      | 6976:7006        | CCTAAAGAACAATTGATTATATAGTAATTT  |
| P-SSM3 | HQ337021  | CYXG_00010 | PhCOG309    | +      | 6987:7017        | ATTGATTATATAGTAATTTCTAAATAATAT  |
| P-SSM3 | HQ337021  | CYXG_00034 | PhCOG71272  | +      | 21481:21511      | CTTAATCCACTTTTACTCTTTTTTTACAAA  |
| P-SSM3 | HQ337021  | CYXG_00075 | PhCOG71460  | +      | 82301:82331      | CTTGCAATATTGTTAAATACTTTGTATAAT  |
| P-SSM3 | HQ337021  | CYXG_00075 | PhCOG71460  | +      | 82309:82339      | ATTGTTAAATACTTTGTATAATGTTGAACG  |
| P-SSM3 | HQ337021  | PRAG_00179 | PhCOG71490  | +      | 124004:124034    | TTTTATGCTATAATTAATCAAGTTAATTT   |

| Genome | Accession | Gene Id     | Cluster Id | Strand | Genomic location | Predicted pho box              |
|--------|-----------|-------------|------------|--------|------------------|--------------------------------|
| P-SSM3 | HQ337021  | PRAG_00179  | PhCOG71490 | +      | 124005:124035    | TTTATGCTATAATTAATCAAGTTAATTTT  |
| P-SSM3 | HQ337021  | CYXG_00141  | PhCOG173   | +      | 128649:128679    | GTTTAACTGTAGTTAAAGATATAGTTAAGG |
| P-SSM3 | HQ337021  | CYXG_00141  | PhCOG173   | +      | 128650:128680    | TTTAACTGTAGTTAAAGATATAGTTAAGGT |
| P-SSM3 | HQ337021  | PRAG_00089  | PhCOG173   | +      | 64823:64853      | GTTAAATGTAGTTAAAGATACAGTTAAGAT |
| P-SSM3 | HQ337021  | PRAG_00089  | PhCOG173   | +      | 64834:64864      | TTAAAGATACAGTTAAGATGATCTAGATAT |
| P-SSM3 | HQ337021  | PRAG_00095  | PhCOG71682 | +      | 67395:67425      | TTTATGTCACAATTAACACATACTTGACCC |
| P-SSM3 | HQ337021  | PRAG_00095  | PhCOG71682 | +      | 67406:67436      | ATTAACACATACTTGACCCTACCCTAGCAT |
| P-SSM3 | HQ337021  | PRAG_00194  | PhCOG71906 | +      | 128630:128660    | TTTTACTACCATTTCAAATAATATTATACT |
| P-SSM3 | HQ337021  | PRAG_00194  | PhCOG71906 | +      | 128641:128671    | TTCAAATAATATTATACTATTATAATAGT  |
| P-SSM3 | HQ337021  | CYXG_00018  | PhCOG72201 | +      | 15627:15657      | TTTAGTTCTATACTAAAGGGGTCTTAAATT |
| P-SSM3 | HQ337021  | CYXG_00087  | PhCOG72321 | +      | 92923:92953      | ACTAACCCTTATTAATAAACTTTTAGGAG  |
| P-SSM3 | HQ337021  | PRAG_00091  | PhCOG72385 | +      | 66412:66442      | CTCCCTCCTTTCTTAAGATTAAGTTAAGTG |
| P-SSM3 | HQ337021  | CYXG_00179  | PhCOG72398 | +      | 152420:152450    | GTTGACAACCCCTTTATTTTTGCTATATAA |
| P-SSM3 | HQ337021  | PRAG_00102  | PhCOG72398 | +      | 70157:70187      | TATAATATGTACATAACTTTACATTAGTTA |
| P-SSM3 | HQ337021  | CYXG_00081  | PhCOG72672 | +      | 86072:86102      | TTTTATAAATATTTTTAGAAAAGTAAACA  |
| P-SSM4 | NC_006884 | PSSM4_070.3 | Orphan_36  | +      | 51040:51070      | TATTATAGCATTTTATTGTACTCTTAGCGT |
| P-SSM4 | NC_006884 | PSSM4_152   | PhCOG186   | +      | 149743:149773    | TTTCAATAGTTCTTATAATTAGTATCGTAA |
| P-SSM4 | NC_006884 | PSSM4_049   | PhCOG71490 | +      | 43434:43464      | TTTTATGCTATAATGATTATAAGTTAAATT |
| P-SSM4 | NC_006884 | PSSM4_171   | PhCOG71682 | +      | 165985:166015    | TTTTTTATGTCTTTATATACACATAGGTT  |
| P-SSM4 | NC_006884 | PSSM4_064   | PhCOG71906 | +      | 48033:48063      | TTTTACTACCATTTCAAATAATATTATACT |

| Genome | Accession | Gene Id    | Cluster Id  | Strand | Genomic location | Predicted pho box               |
|--------|-----------|------------|-------------|--------|------------------|---------------------------------|
| P-SSM4 | NC_006884 | PSSM4_064  | PhCOG71906  | +      | 48044:48074      | TTCAAATAATATTATACTATTATAATAGT   |
| P-SSM4 | NC_006884 | PSSM4_177  | PhCOG72398  | +      | 168592:168622    | TATAATATGTACATAACTTTACATTAGTTA  |
| P-SSM4 | NC_006884 | PSSM4_112  | PhCOG72724  | +      | 121450:121480    | GATAAGAAACTCATAAAAAAATTTCAAGAT  |
| P-SSM4 | NC_006884 | PSSM4_169  | PhCOG73152  | +      | 163785:163815    | GTAAATGTAGTTAAAGATACAGTTAAAAT   |
| P-SSM4 | NC_006884 | PSSM4_054  | PhCOG929    | +      | 45628:45658      | CTCCATTTTAATTATTCATCCATTACAAT   |
| P-SSM5 | HQ632825  | PRTG_00044 | Orphan_1229 | -      | 29081:29111      | TTAAATACTTTCTTACCCAGACATCATAT   |
| P-SSM5 | HQ632825  | PRTG_00125 | Orphan_1230 | -      | 94230:94260      | CTTGACTAAATAATTAATAATGTGTTATTAT |
| P-SSM5 | HQ632825  | PRTG_00198 | PhCOG2077   | -      | 152304:152334    | CTTTTCATATTTCTGAGTATTTCTTACTGT  |
| P-SSM5 | HQ632825  | PRTG_00010 | PhCOG611    | -      | 18154:18184      | ATTCCATCAAACCTCAAATTTTTTTTCGCT  |
| P-SSM5 | HQ632825  | PRTG_00012 | PhCOG71075  | -      | 18790:18820      | CTTAAACGATTATTAATTTGGCACTCACCC  |
| P-SSM5 | HQ632825  | PRTG_00303 | PhCOG71234  | -      | 217296:217326    | TTAAAGATCTATTTCCAATTTTCATTAACA  |
| P-SSM5 | HQ632825  | PRTG_00194 | PhCOG173    | -      | 149999:150029    | AATGTATAGATATTACAGTTTCTTTAAAAA  |
| P-SSM5 | HQ632825  | PRTG_00194 | PhCOG173    | -      | 150024:150054    | TTACATATCAATTAATTTGATATAATGT    |
| P-SSM5 | HQ632825  | PRTG_00194 | PhCOG173    | -      | 150029:150059    | CTTAGTTTACATATCAATTAATTTGATAT   |
| P-SSM5 | HQ632825  | PRTG_00194 | PhCOG173    | -      | 150040:150070    | CTTAACCTTCTCTTAGTTTACATATCAATT  |
| P-SSM5 | HQ632825  | PRTG_00194 | PhCOG173    | -      | 150051:150081    | ACTAAACTTCCCTTAACCTTCTCTTAGTTT  |
| P-SSM5 | HQ632825  | PRTG_00194 | PhCOG173    | -      | 150062:150092    | TATAAACGGATACTAAACTTCCCTTAACCT  |
| P-SSM5 | HQ632825  | PRTG_00158 | PhCOG71852  | -      | 126201:126231    | GTTATTACTGCATTTCAATTTTCGTTTATTT |
| P-SSM5 | HQ632825  | PRTG_00130 | PhCOG72256  | -      | 96504:96534      | TATAATACTACTAAATAATTTTTTAAAC    |
| P-SSM5 | HQ632825  | PRTG_00307 | PhCOG72320  | -      | 221029:221059    | TTAACAAATCTATAAATAAGTATAGATTC   |

| Genome | Accession | Gene Id    | Cluster Id | Strand | Genomic location | Predicted pho box              |
|--------|-----------|------------|------------|--------|------------------|--------------------------------|
| P-SSM5 | HQ632825  | PRTG_00199 | PhCOG72352 | +      | 152238:152268    | TTTTATTATATATTATAACATACTTTTAGT |
| P-SSM5 | HQ632825  | PRTG_00199 | PhCOG72352 | +      | 152239:152269    | TTTATTATATATTATAACATACTTTTAGTA |
| P-SSM5 | HQ632825  | PRTG_00187 | PhCOG72394 | -      | 146646:146676    | ATAAGAGTATTTTTTATTATTGTTTTATCA |
| P-SSM5 | HQ632825  | PRTG_00169 | PhCOG72398 | -      | 133766:133796    | GTAAAGGTTTACTATATAATTATGTAAAGA |
| P-SSM5 | HQ632825  | PRTG_00016 | PhCOG72979 | -      | 20336:20366      | TTTTTGCTATACTTAATTTGTACACACGAA |
| P-SSM5 | HQ632825  | PRTG_00077 | PhCOG73040 | -      | 46167:46197      | TGTAGGACAGGCTTTATAATTTTTTAAGAA |
| P-SSM5 | HQ632825  | PRTG_00093 | PhCOG73056 | -      | 69018:69048      | AATTAACACCACTTATATTAGCGTTAAGAT |
| P-SSM5 | HQ632825  | PRTG_00096 | PhCOG73058 | -      | 75208:75238      | CATTAACACTAATTAAGATACATTCGGAA  |
| P-SSM5 | HQ632825  | PRTG_00131 | PhCOG73090 | -      | 98059:98089      | CATTATAAATATTTAAAATTATTGTGTGTT |
| P-SSM5 | HQ632825  | PRTG_00131 | PhCOG73090 | -      | 98070:98100      | GTTAATATAATCATTATAAATATTTAAAAT |
| P-SSM5 | HQ632825  | PRTG_00131 | PhCOG73090 | -      | 98081:98111      | TTTCCGTTTCTGTTAATATAATCATTATAA |
| P-SSM5 | HQ632825  | PRTG_00131 | PhCOG73090 | -      | 98130:98160      | TTTAATTTATTATTTAATTCTTGATAATCA |
| P-SSM5 | HQ632825  | PRTG_00131 | PhCOG73090 | -      | 98133:98163      | TTTTTTAATTTATTATTTAATTCTTGATAA |
| P-SSM5 | HQ632825  | PRTG_00131 | PhCOG73090 | -      | 98140:98170      | TATAATCTTTTTTAATTTATTATTTAATTC |
| P-SSM5 | HQ632825  | PRTG_00131 | PhCOG73090 | -      | 98141:98171      | ATATAATCTTTTTTAATTTATTATTTAATT |
| P-SSM5 | HQ632825  | PRTG_00139 | PhCOG73098 | -      | 104112:104142    | TATAAATCACCAATGATATAATATTAACA  |
| P-SSM5 | HQ632825  | PRTG_00162 | PhCOG73121 | -      | 131307:131337    | CTTCTTATTAATAATAGTATGTTATTC    |
| P-SSM5 | HQ632825  | PRTG_00297 | PhCOG73251 | -      | 214170:214200    | TATAACAATTATTAATAAGGATATATTA   |
| P-SSM7 | NC_015290 | PSSM7_129  | PhCOG129   | +      | 117269:117299    | ATTAACACATACTTTTAACTTGATAAATA  |
| P-SSM7 | NC_015290 | PSSM7_219  | PhCOG217   | +      | 168070:168100    | CTTAGGAATAGTTTCAGCAACAGTTGTATA |

| Genome | Accession | Gene Id   | Cluster Id | Strand | Genomic location | Predicted pho box               |
|--------|-----------|-----------|------------|--------|------------------|---------------------------------|
| P-SSM7 | NC_015290 | PSSM7_226 | PhCOG224   | +      | 170723:170753    | TTTGACACATAAAATAAATCAACCGTATAAT |
| P-SSM7 | NC_015290 | PSSM7_174 | PhCOG173   | +      | 142552:142582    | TATAAACAAATACTAAACTTCCCTTAACCT  |
| P-SSM7 | NC_015290 | PSSM7_174 | PhCOG173   | +      | 142563:142593    | ACTAAACTTCCCTTAACCTTCTCTTAGTTT  |
| P-SSM7 | NC_015290 | PSSM7_174 | PhCOG173   | +      | 142574:142604    | CTTAACCTTCTCTTAGTTTACATATCAATT  |
| P-SSM7 | NC_015290 | PSSM7_174 | PhCOG173   | +      | 142585:142615    | CTTAGTTTACATATCAATTAATTTGATGT   |
| P-SSM7 | NC_015290 | PSSM7_174 | PhCOG173   | +      | 142590:142620    | TTTACATATCAATTAATTTGATGTAATGT   |
| P-SSM7 | NC_015290 | PSSM7_174 | PhCOG173   | +      | 142601:142631    | ATTAATTTGATGTAATGTATACATAATAC   |
| P-SSM7 | NC_015290 | PSSM7_207 | PhCOG71682 | +      | 165038:165068    | GTTGTACCCCTCTTTTTTATGIGTTAATAT  |
| P-SSM7 | NC_015290 | PSSM7_207 | PhCOG71682 | +      | 165049:165079    | CTTTTTATGIGTTAATATATACTATAACC   |
| P-SSM7 | NC_015290 | PSSM7_173 | PhCOG71713 | +      | 141972:142002    | TTTAAGATTTTCATAGTGTGTGATTAATA   |
| P-SSM7 | NC_015290 | PSSM7_236 | PhCOG71968 | +      | 178970:179000    | ATTATGATCTTTATAAAAAGAACTTTGTAA  |
| P-SSM7 | NC_015290 | PSSM7_213 | PhCOG72398 | +      | 167104:167134    | GTTGACAAAACCTTACAATTGCTATATAAT  |
| S-PM2  | AJ630128  | S-PM2p177 | Orphan_44  | +      | 136624:136654    | GTAAAGGAACTCTTCGGAGTTCCTTTTTTT  |
| S-PM2  | AJ630128  | S-PM2p102 | Orphan_90  | +      | 72766:72796      | AGAAAATAATAAATAATTTTAGATTAAATT  |
| S-PM2  | AJ630128  | S-PM2p204 | PhCOG1328  | +      | 149619:149649    | GTTTATACACCCCTGAATATGCCATAAATA  |
| S-PM2  | AJ630128  | S-PM2p063 | PhCOG1370  | +      | 19563:19593      | GATTTCTTAAGATTTAAGATTTCTTAAGAT  |
| S-PM2  | AJ630128  | S-PM2p063 | PhCOG1370  | +      | 19564:19594      | ATTTCTTAAGATTTAAGATTTCTTAAGATT  |
| S-PM2  | AJ630128  | S-PM2p063 | PhCOG1370  | +      | 19574:19604      | ATTTAAGATTTCTTAAGATTTAAGATTTCT  |
| S-PM2  | AJ630128  | S-PM2p063 | PhCOG1370  | +      | 19580:19610      | GATTTCTTAAGATTTAAGATTTCTTAAGAT  |
| S-PM2  | AJ630128  | S-PM2p063 | PhCOG1370  | +      | 19581:19611      | ATTTCTTAAGATTTAAGATTTCTTAAGATT  |

| Genome | Accession | Gene Id   | Cluster Id  | Strand | Genomic location | Predicted pho box               |
|--------|-----------|-----------|-------------|--------|------------------|---------------------------------|
| S-PM2  | AJ630128  | S-PM2p063 | PhCOG1370   | +      | 19591:19621      | ATTTAAGATTCTTAAGATTTAACTTTAA    |
| S-PM2  | AJ630128  | S-PM2p064 | PhCOG1371   | +      | 19907:19937      | ATTAATATTACTATTTGATTATTTTCACCC  |
| S-PM2  | AJ630128  | S-PM2p208 | PhCOG4725   | +      | 154886:154916    | ATTGATATTCGATTACCTAAATTTTAAAAA  |
| S-PM2  | AJ630128  | S-PM2p208 | PhCOG4725   | +      | 154896:154926    | GATTACCTAAATTTTAAAAAATTTTCCCG   |
| S-PM2  | AJ630128  | S-PM2p208 | PhCOG4725   | +      | 154897:154927    | ATTACCTAAATTTTAAAAAATTTTCCCGC   |
| S-PM2  | AJ630128  | S-PM2p179 | PhCOG71554  | +      | 137765:137795    | ATTGACCTTTATGTTAAGGTATGTTAAAT   |
| S-PM2  | AJ630128  | S-PM2p176 | PhCOG71555  | +      | 135237:135267    | TATAATAAATAGGTAAACAAATGTTAAGGA  |
| S-PM2  | AJ630128  | S-PM2p251 | PhCOG72199  | +      | 193756:193786    | CTTAAGATTTGCTTAAGATTAGATTTTTTG  |
| S-PM2  | AJ630128  | S-PM2p107 | PhCOG72320  | +      | 78276:78306      | CTAAATTAATAAATAAACTATAGATAAAAT  |
| S-RSM4 | NC_013085 | SRSM4_170 | Orphan_1019 | -      | 139936:139966    | TTTAACAAAAACCTCAAAATGTCTAAAAAG  |
| S-RSM4 | NC_013085 | SRSM4_215 | Orphan_1050 | -      | 176037:176067    | ATTCTACTACATTTACATCTGTATTAAGGA  |
| S-RSM4 | NC_013085 | SRSM4_012 | Orphan_966  | -      | 4201:4231        | GTTATCATTGGCATTAAATCTTTTTTAGTCA |
| S-RSM4 | NC_013085 | SRSM4_111 | Orphan_994  | -      | 75627:75657      | AATCTAAATAGATTTAGATAAATTTGATAT  |
| S-RSM4 | NC_013085 | SRSM4_106 | PhCOG72320  | -      | 70458:70488      | AATAAACTTAGATTAATTATACGGAAATTA  |
| S-RSM4 | NC_013085 | SRSM4_028 | PhCOG72398  | -      | 10818:10848      | CTTGACACATCTTTACAATTGCTATATACT  |
| S-RSM4 | NC_013085 | SRSM4_104 | PhCOG73121  | -      | 67783:67813      | TGTAAATAGTATATAATGATTTGTAAAGTT  |
| S-RSM4 | NC_013085 | SRSM4_234 | PhCOG761    | +      | 190956:190986    | GATTACTATTATTTAAACGGAAAATATATT  |
| S-RSM4 | NC_013085 | SRSM4_234 | PhCOG761    | +      | 190967:190997    | TTTAAACGGAAAATATATTTTTTTTAAATGG |
| S-ShM2 | NC_015281 | SShM2_117 | Orphan_493  | +      | 110243:110273    | TTTTATAAATATTTCTAGAACTGTAAAGA   |
| S-ShM2 | NC_015281 | SShM2_124 | PhCOG72321  | +      | 117109:117139    | TGTAATTATTTTCGTAAATAACATTTTTTCT |

| Genome | Accession | Gene Id    | Cluster Id | Strand | Genomic location | Predicted pho box              |
|--------|-----------|------------|------------|--------|------------------|--------------------------------|
| S-SM1  | NC_015282 | SSM1_117   | PhCOG71433 | +      | 100379:100409    | ATTAAATAACTTAAAGGTAAAACTTCAT   |
| S-SM1  | NC_015282 | SSM1_172   | PhCOG173   | +      | 135311:135341    | TTTATTGATACCTTAAACTGCCCTTACCCA |
| S-SM1  | NC_015282 | SSM1_063   | PhCOG72528 | +      | 40031:40061      | ATACTACAGTAGTTTATCTTTACTTCAACA |
| S-SM1  | NC_015282 | SSM1_063   | PhCOG72528 | +      | 40042:40072      | GTTTATCTTACTTCAACATCTTTAACAAT  |
| S-SM2  | NC_015279 | SSM2_091   | Orphan_544 | +      | 59197:59227      | TTATAATTGATCTTGAAGGTTAATTCATCT |
| S-SM2  | NC_015279 | SSM2_218   | PhCOG173   | +      | 163970:164000    | CTTAACCTTTTCTGGTGGACTATTTTTTT  |
| S-SM2  | NC_015279 | SSM2_118   | PhCOG72320 | +      | 101677:101707    | TTTAATTTATAAATAAATATAGATTTTATA |
| S-SM2  | NC_015279 | SSM2_008   | PhCOG73063 | -      | 4889:4919        | TATAAATAATTTTTAACCTTATATATTATG |
| S-SSM2 | JF974292  | CPLG_00179 | PhCOG72321 | -      | 128325:128355    | TGTAATTATTCGTAAATAACATTTTTTCT  |
| S-SSM2 | JF974292  | CPLG_00144 | PhCOG72352 | +      | 105160:105190    | AATGATAAACTTAGACATGAATCCATAT   |
| S-SSM2 | JF974292  | CPLG_00185 | PhCOG72672 | -      | 135192:135222    | TTTTATAAATATTTCTAGAACTGTAAAGA  |
| S-SSM5 | NC_015289 | SSSM5_127  | Orphan_751 | +      | 116354:116384    | CTTGACACCCTCTTTTTTATGCTATAATT  |
| S-SSM5 | NC_015289 | SSSM5_044  | PhCOG1016  | +      | 35326:35356      | ACTAAAGATCATTTAATTTTGATTTAAAAG |
| S-SSM5 | NC_015289 | SSSM5_041  | PhCOG73097 | -      | 34237:34267      | CTTCAATGAGACTAACTAGTTCTTCAGGA  |
| S-SSM7 | NC_015287 | SSSM7_237  | Orphan_620 | +      | 193797:193827    | AGTTAGAATAGTTTATGTAAGTTTAAATAA |
| S-SSM7 | NC_015287 | SSSM7_084  | Orphan_674 | +      | 50686:50716      | ATTAAGTAACATTTAAAAAAGGTAAAATAA |
| S-SSM7 | NC_015287 | SSSM7_084  | Orphan_674 | +      | 50726:50756      | GTTTATTATCTCTTAAACATTTTATGATT  |
| S-SSM7 | NC_015287 | SSSM7_084  | Orphan_674 | +      | 50727:50757      | TTTATTATCTCTTAAACATTTTATGATTA  |
| S-SSM7 | NC_015287 | SSSM7_080  | Orphan_677 | +      | 49791:49821      | AATTAATCGTCTTTAATTGTTACTTAGTGG |
| S-SSM7 | NC_015287 | SSSM7_070  | Orphan_684 | +      | 47427:47457      | TATAATGAGTACATAACAAACATTTAAGGA |



| Genome | Accession | Gene Id    | Cluster Id | Strand | Genomic location | Predicted pho box                 |
|--------|-----------|------------|------------|--------|------------------|-----------------------------------|
| S-SSM7 | NC_015287 | SSSM7_046  | Orphan_701 | +      | 40640:40670      | GATAATTC AATCTTATAGTATAATCAA AACT |
| S-SSM7 | NC_015287 | SSSM7_009  | Orphan_728 | +      | 5326:5356        | TTTTAGTATGTTTTGGTTTAAATTTCCCT     |
| S-SSM7 | NC_015287 | SSSM7_135  | PhCOG410   | +      | 113817:113847    | TTTCTGACTCGTTTATAAAAATACTTTTTCA   |
| S-SSM7 | NC_015287 | SSSM7_056  | PhCOG71272 | +      | 43856:43886      | TTTCACCATACTATAATAAGTACATAACAA    |
| S-SSM7 | NC_015287 | SSSM7_147  | PhCOG72320 | +      | 126705:126735    | ATTATACGATATCTAAACACGTTTTACGAC    |
| S-SSM7 | NC_015287 | SSSM7_148  | PhCOG72321 | +      | 127842:127872    | GTTAATTTTTAACTAACA AACTCTTAGACCG  |
| S-SSM7 | NC_015287 | SSSM7_269  | PhCOG72398 | +      | 213022:213052    | CTTGACAAAATTTTATATTTCTATATAAT     |
| S-SSM7 | NC_015287 | SSSM7_003  | PhCOG72419 | +      | 644:674          | ATTGACTATTACATAATTATCTGGTATAAT    |
| Syn1   | NC_015288 | Syn1_051   | PhCOG1310  | +      | 51958:51988      | TTTTAGTGACACTTGATGAAGTGTCTACTA    |
| Syn1   | NC_015288 | Syn1_076   | PhCOG1371  | +      | 59314:59344      | ATTGATGTATTTTTGATACTAATTGATTAA    |
| Syn1   | NC_015288 | Syn1_131   | PhCOG73251 | +      | 123003:123033    | CTTGACATGTTCTTGATCATCGACTATAAT    |
| Syn10  | HQ634191  | CPUG_00151 | PhCOG71524 | -      | 135732:135762    | AATTA AATTCCGTTAATAACATTTTAGGAT   |
| Syn10  | HQ634191  | CPUG_00151 | PhCOG71524 | -      | 135743:135773    | TTTAGTTGATCAATTA AATTCCGTTAATAA   |
| Syn10  | HQ634191  | CPUG_00188 | PhCOG72398 | -      | 163468:163498    | CTTGACAAAAGATTAAGTTTGCTATATAAT    |
| Syn10  | HQ634191  | CPUG_00148 | PhCOG72551 | -      | 133547:133577    | CTTCGCCCATATATAATTCAACCTTTAATT    |
| Syn19  | NC_015286 | Syn19_155  | PhCOG72355 | +      | 137340:137370    | CTTTAGACTCAATTCAACCTACTATTATAG    |
| Syn19  | NC_015286 | Syn19_009  | PhCOG72425 | -      | 5140:5170        | AATAAATAATGATTACACCTTATTTAGGCA    |
| Syn19  | NC_015286 | Syn19_009  | PhCOG72425 | -      | 5144:5174        | CATAAATAAATAATGATTACACCTTATTTA    |
| Syn19  | NC_015286 | Syn19_010  | PhCOG73063 | +      | 5076:5106        | CTTCATCATCTCTAAAACCAGCATTAGGGT    |
| Syn2   | HQ634190  | CPTG_00065 | PhCOG72355 | +      | 71451:71481      | CTTTAGACTCAATTCAACCTACTATTATAG    |

| Genome | Accession | Gene Id    | Cluster Id | Strand | Genomic location | Predicted pho box               |
|--------|-----------|------------|------------|--------|------------------|---------------------------------|
| Syn2   | HQ634190  | CPTG_00128 | PhCOG72416 | +      | 109020:109050    | ATTTACAACACTTAAGTCCTATATTGAAG   |
| Syn2   | HQ634190  | CPTG_00196 | PhCOG72484 | +      | 159262:159292    | GTTTGTCCGCTATTAACAACATTTCAAATA  |
| Syn2   | HQ634190  | CPTG_00138 | PhCOG73063 | +      | 114415:114445    | CTTCATCATCTCTAAAACCAGCATTAGGGT  |
| Syn30  | HQ634189  | CPRG_00093 | PhCOG1168  | -      | 66544:66574      | TATTAAGGAACTCACTAAACCTTAAATA    |
| Syn30  | HQ634189  | CPRG_00138 | PhCOG173   | -      | 97688:97718      | TTTATTGATATGTTAAACTGCCCTTACCCT  |
| Syn30  | HQ634189  | CPRG_00133 | PhCOG72099 | -      | 94591:94621      | CATAATACATAATTAAGAGACCTTCCAAA   |
| Syn30  | HQ634189  | CPRG_00010 | PhCOG72501 | -      | 13352:13382      | GTTGAGGGGTATATTACTTTTATTTACACAC |
| Syn30  | HQ634189  | CPRG_00187 | PhCOG72677 | -      | 131817:131847    | ATTAGCAGTCATTTACATTATACTAAAACCT |
| Syn33  | NC_015285 | Syn33_120  | Orphan_396 | +      | 108556:108586    | ATGGAAGACTATTTTATCATAAAGTAATTG  |
| Syn33  | NC_015285 | Syn33_014  | Orphan_413 | +      | 7089:7119        | ATACTGAGAAGATTAAATTATTCTTAGATA  |
| Syn33  | NC_015285 | Syn33_014  | Orphan_413 | +      | 7100:7130        | ATTAAATTATTCTTAGATAAATCACTCTTT  |
| Syn33  | NC_015285 | Syn33_226  | PhCOG71968 | +      | 171103:171133    | ATTGGGACTTATATAAAAAAGACCTAATTA  |
| Syn33  | NC_015285 | Syn33_187  | PhCOG72003 | +      | 150087:150117    | TTTTATAAATAAATATATTGGAATTAATAC  |
| Syn33  | NC_015285 | Syn33_050  | PhCOG72528 | +      | 36202:36232      | TGTAATTTATCATTGATCATTTCATTACAA  |
| Syn33  | NC_015285 | Syn33_050  | PhCOG72528 | +      | 36213:36243      | ATTGATCATTTCATTACAATGGGTAAAACCT |
| Syn33  | NC_015285 | Syn33_224  | PhCOG72578 | +      | 170197:170227    | GGTTCCATATTATTACACAAGACTTAAAAG  |
| Syn33  | NC_015285 | Syn33_084  | PhCOG72899 | +      | 47313:47343      | CTTGAGATATTATTCAATAATACTTTAGTG  |
| Syn33  | NC_015285 | Syn33_084  | PhCOG72899 | +      | 47324:47354      | ATTCAATAATACTTTAGTGTCAATCTAAAA  |
| Syn9   | NC_008296 | BSV9_gp209 | PhCOG72398 | +      | 163317:163347    | CTTGACAAAAGATTAAGTTTGCTATATAAT  |
| Syn9   | NC_008296 | BSV9_gp20  | PhCOG72551 | +      | 16036:16066      | CTTCGCCCATATATAATTCAACCTTTAATT  |

**Supplementary Table 3:** Predicted pho boxes more than 100bp upstream of genes in the *PhCOG173/pstS/phoA* region.

| Genome | Accession | Gene Id    | Cluster Id | Strand | Genomic location | Distance upstream of gene | Predicted pho box              |
|--------|-----------|------------|------------|--------|------------------|---------------------------|--------------------------------|
| S-SSM7 | NC_015287 | SSSM7_291  | PhCOG173   | +      | 220904:220934    | 121                       | GTTGACAAATACATACTTGTCGTTAACCT  |
| S-SSM5 | NC_015289 | SSSM5_163  | PhCOG71713 | +      | 137087:137117    | 142                       | AGAGTTTGAGCTTACAAGATTAACCAAGTG |
| P-RSM1 | HQ634175  | CPPG_00148 | PhCOG71713 | -      | 97759:97789      | 135                       | GGTAAAAACTTGTCATTTTTTCTCACATG  |
